# Supplementary material
Source: PubMed Central journal article supplement (PMC10474071)
Supplement: 41422_2023_818_MOESM1_ESM.pdf [file 41422_2023_818_MOESM1_ESM.pdf]

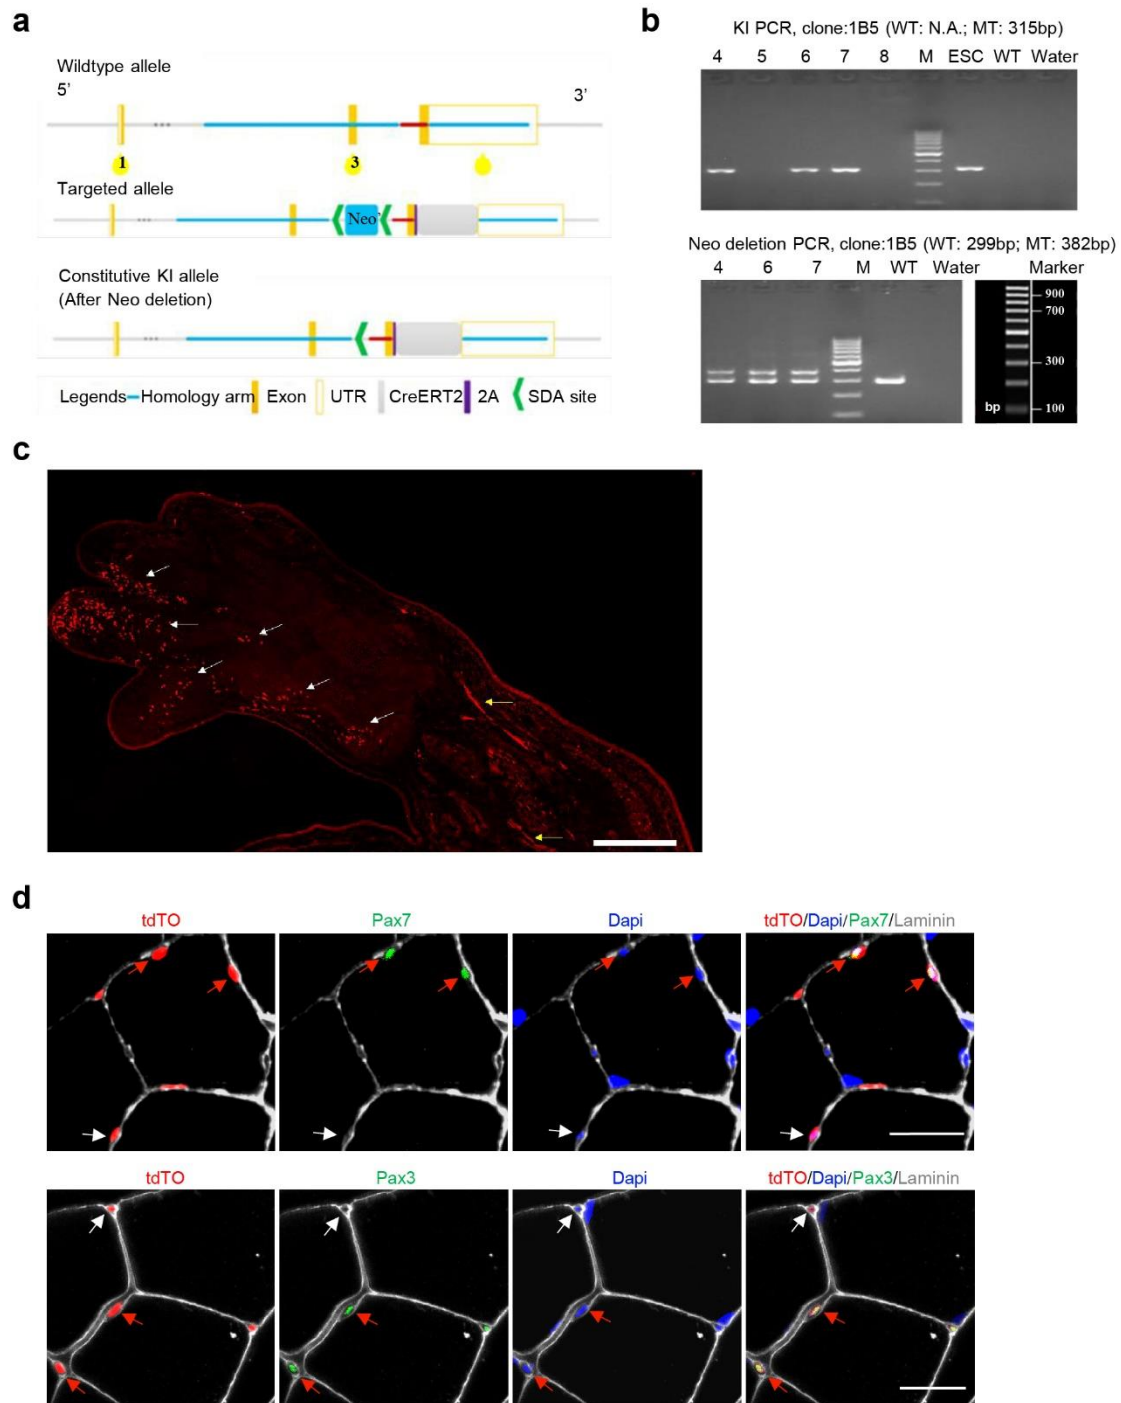

**(d)** Cryosections of the TA muscle of *Lin28a-T2A-CreER; LSL-tdTO* mice at 14 days after cryoinjury. Muscle sections were co-stained for laminin (white), DAPI (blue) and Pax7 or Pax3 (green). Red arrows indicate Lin28a+ Pax7+ or Lin28a+Pax3+ cells, and white arrows indicate Lin28a+Pax7- or Lin28a+ Pax3- cells. Scale bar: 20 $\mu$ m.
