# Supplementary material
Source: PubMed Central journal article supplement (PMC10474071)
Supplement: 41422_2023_818_MOESM4_ESM.pdf [file 41422_2023_818_MOESM4_ESM.pdf]

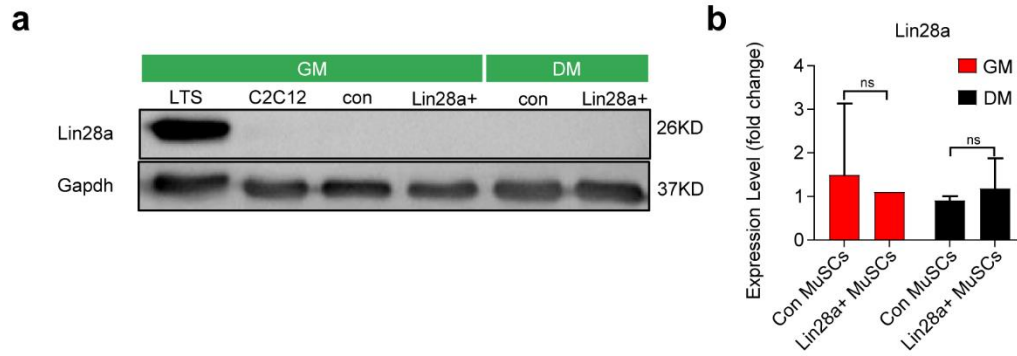

**Fig. S4. The expression of *Lin28a* gene and protein in *Lin28a*+ MuSCs *in vitro*. (The cells were cultured for 2 months before analyses.)**

**(a)** Western blot analysis for *Lin28a* protein (26 kD) in mouse C2C12 myoblasts, conventional (con) Pax7+ MuSCs and *Lin28a*+ cells in myogenic growth medium (GM) and differentiation medium (DM). LTS is a positive control cell-line which overexpressed *Lin28a*. *Lin28a* expression was extinguished once cells were plated in culture, and it was not detected in any conditions. Gapdh protein was used as the loading control.

**(b)** Quantitative RT-PCR revealed expression levels of *Lin28a* in conventional (con) MuSCs and *Lin28a*+ cells in myogenic growth medium (GM) and differentiation medium (DM). Data are mean  $\pm$  SEM. N = 3 independent experiments.

Ns, not significant.
