# Supplementary material
Source: PubMed Central journal article supplement (PMC10474071)
Supplement: 41422_2023_818_MOESM5_ESM.pdf [file 41422_2023_818_MOESM5_ESM.pdf]

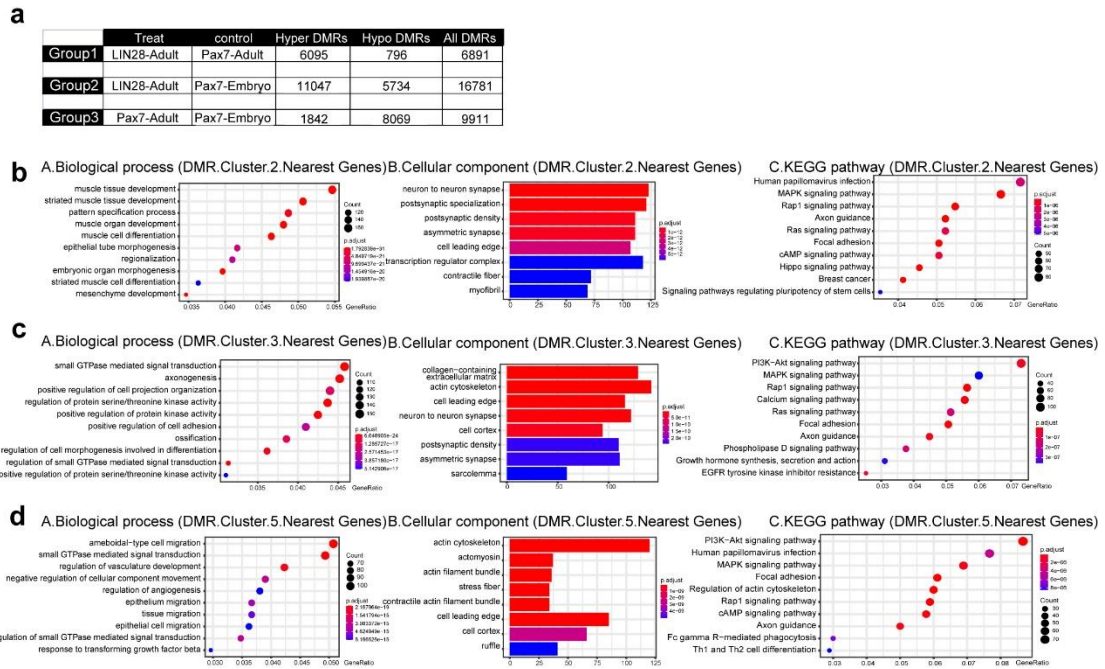

**Fig. S5. Whole-genome bisulfite sequencing (WGBS) analysis for embryonic progenitors and adult Lin28a+ MuSCs and Pax7+ MuSCs (N=3 each).**

(a) Whole-genome bisulfite sequencing (WGBS) analysis for Myf5+ Pax7+ embryonic progenitors and adult Lin28a+ MuSCs and Pax7+ MuSCs (N=3 each).

(b) GO and KEGG analysis of Cluster 2 in Fig.5.a.

(c) GO and KEGG analysis of Cluster 3 in Fig.5.a.

(d) GO and KEGG analysis of Cluster 5 in Fig.5.a.
