# Supplementary material
Source: PubMed Central journal article supplement (PMC10474071)
Supplement: 41422_2023_818_MOESM7_ESM.pdf [file 41422_2023_818_MOESM7_ESM.pdf]

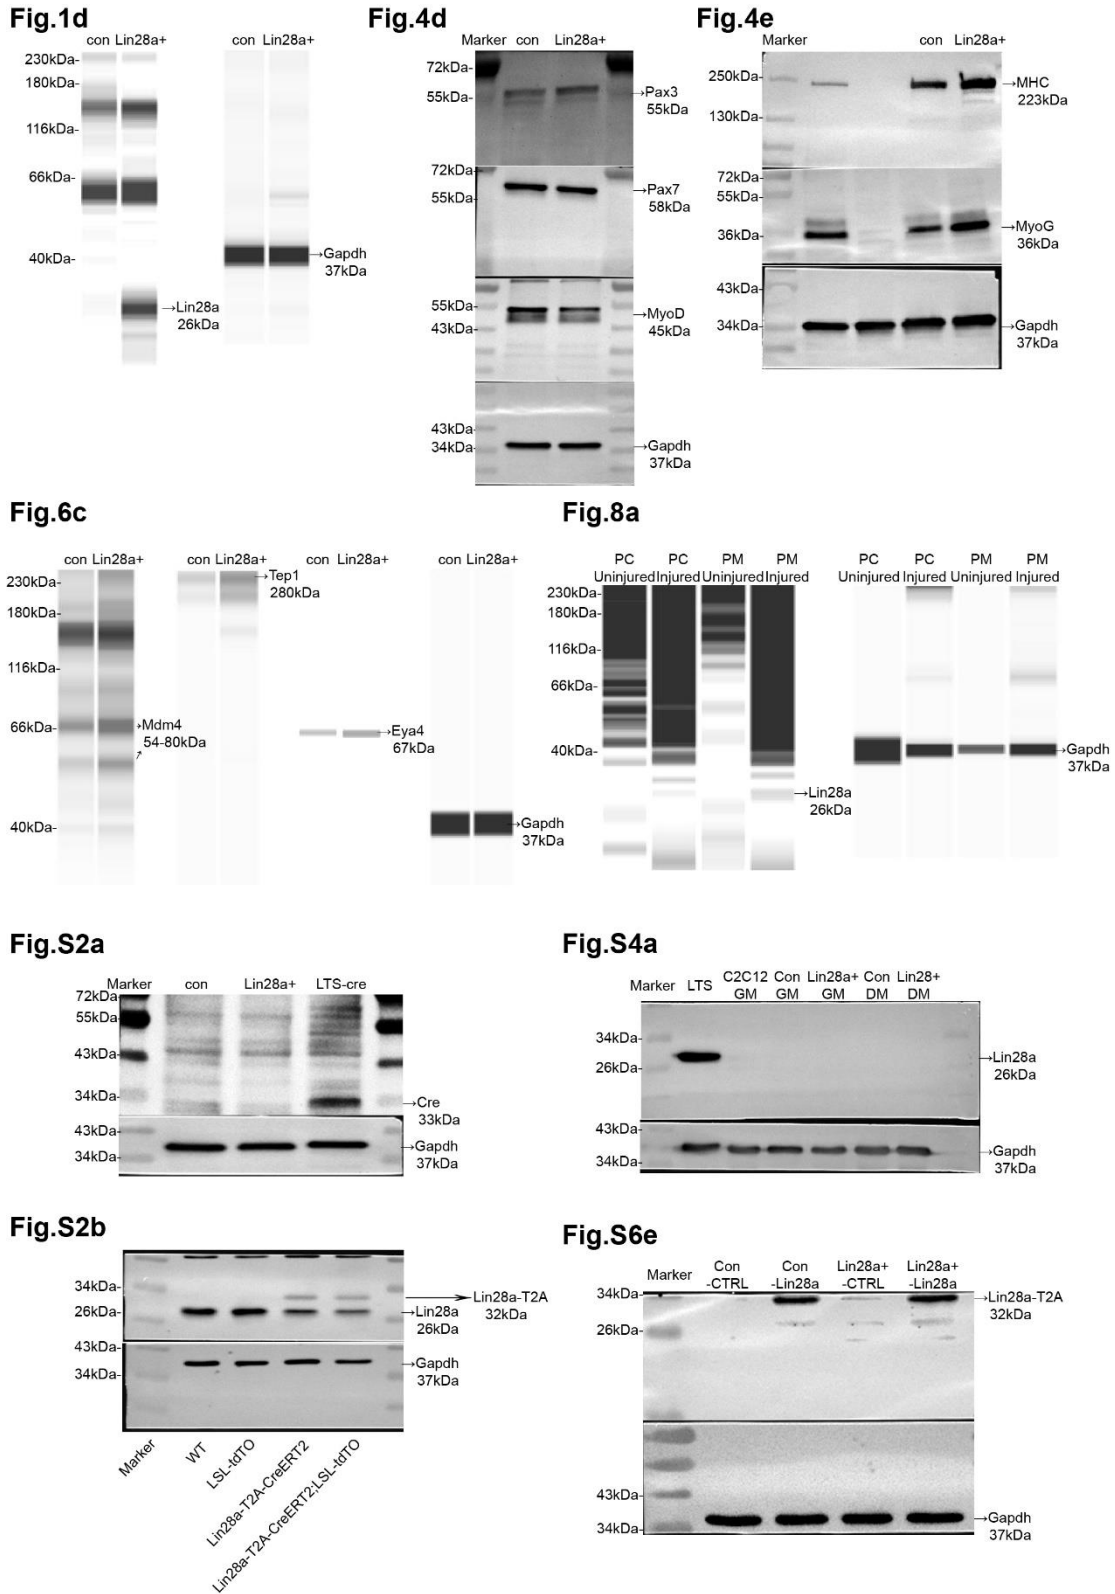

**Fig. S7.** Unprocessed original scans of Western blots or low protein input capillary immunoassay results for Fig. 1d, Fig. 4d, Fig. 4e, Fig. 6c, Fig. 8a, Fig. S2a, Fig. S2b, Fig. S4a, and Fig. S6e.
